# Supplementary material
Source: HighWire-hosted journal article supplement (https://rc.rcjournal.com/highwire/filestream/21586/field_highwire_adjunct_files/0/Aerosol_Delivery_from_the_Dry_Side_.pdf)
Supplement: Aerosol_Delivery_from_the_Dry_Side_.pdf [file Aerosol_Delivery_from_the_Dry_Side_.pdf]

# Aerosol Delivery via Nebulization from the Dry Side of a Heated Humidifier During Mechanical Ventilation

Janice A Lee<sup>1</sup> • Ann D Cuccia<sup>2</sup> • Michael McPeck<sup>1</sup> • Gerald C Smaldone<sup>1</sup>

<sup>1</sup>Division of Pulmonary, Critical Care and Sleep Medicine, & <sup>2</sup>Respiratory Care Program; Stony Brook University, State University of New York, Stony Brook

## BACKGROUND

Nebulizers on the wet/outlet side of the heated humidifier create a “heat break” resulting in excess condensation in the nebulizer and inspiratory limb, risking circuit occlusion. Dry/inlet side placement eliminates the heat break and avoids excess condensation. This study compared dry side aerosol delivery (Inhaled Mass, IM) of a prototype inline breath-enhanced jet nebulizer (BEJN) *versus* a vibrating mesh nebulizer (VMN) using real-time measurement of nebulized radioaerosol.\*

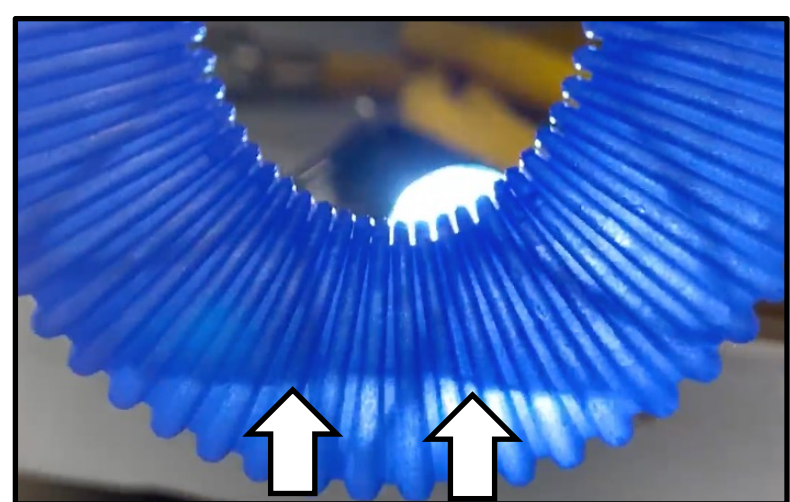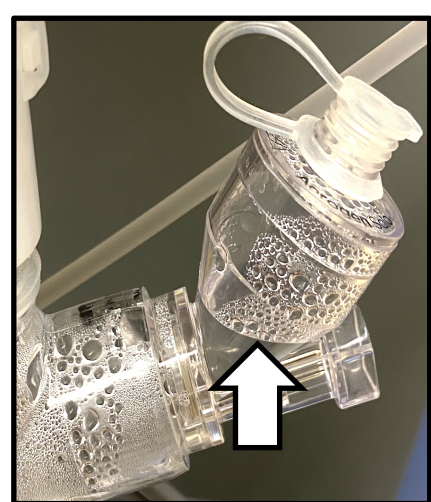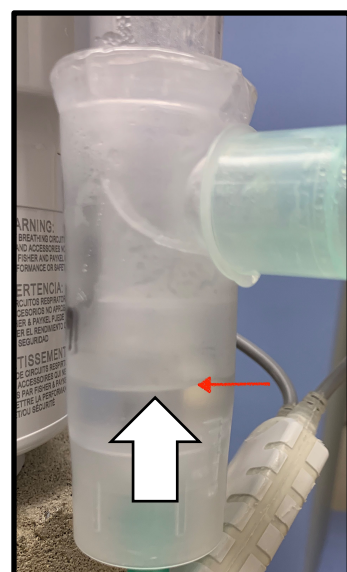

## TEST SETUP & METHODS

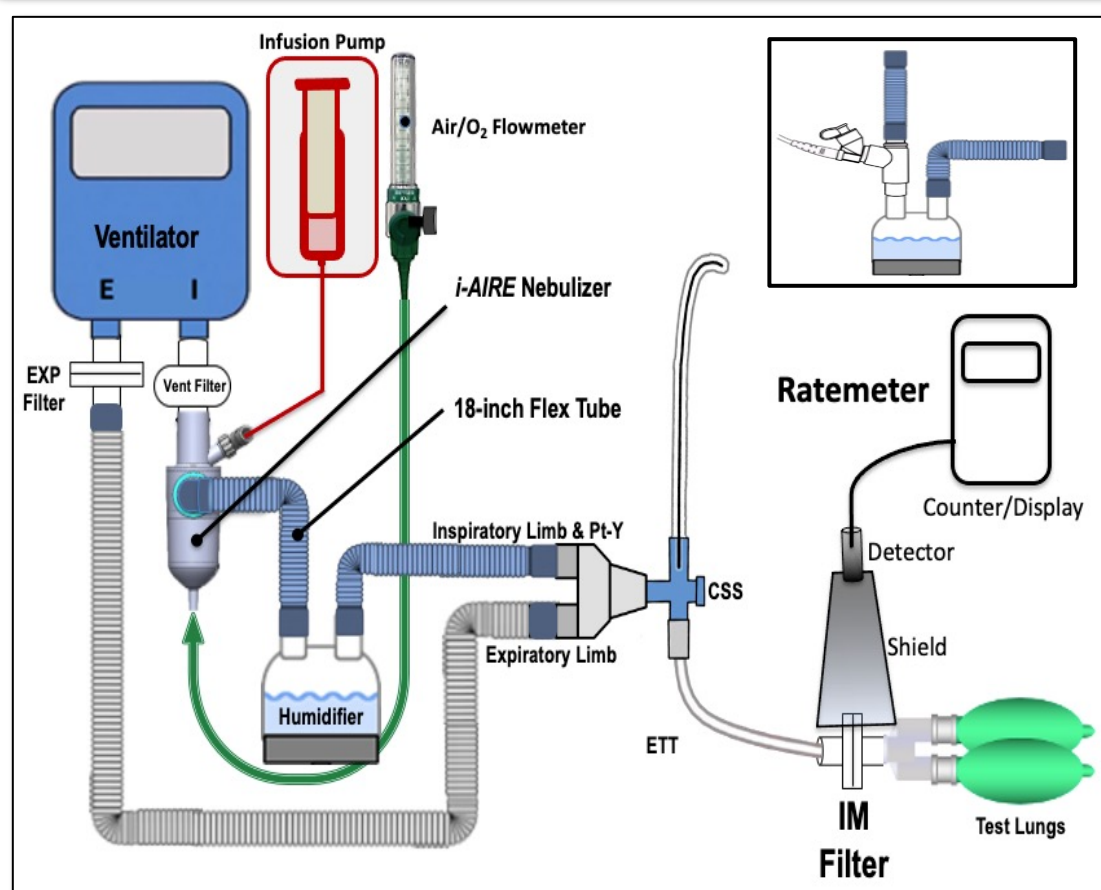

- Radiolabeled <sup>99m</sup>Tc/saline used as aerosol tracer
- Inhaled mass (IM) filter at airway opening of test lung
- Gamma ratemeter detector oriented towards IM filter to measure radioactivity accumulating on the filter
- Adult ventilator with heated wire circuit/heated humidifier;
- 2 duty cycles (DC): 0.13 & 0.34

### Protocol:

- InspiRx *i-AIRE* BEJN (figure) connected to inlet of humidifier
- Aerogen Solo VMN nebulizer (inset in figure) on inlet of humidifier
- Tested 3- & 6-mL bolus treatments plus continuous infusion delivery
- Infusion of neb with radiolabeled saline supplied by infusion pump
- Tested 4 sets of deliberate changes in breathing pattern and infusion flow

\* J Aerosol Med 2021; 34(0):1-9.

## RESULTS

Example bolus treatment test runs with *i-AIRE* and Solo from Table below:

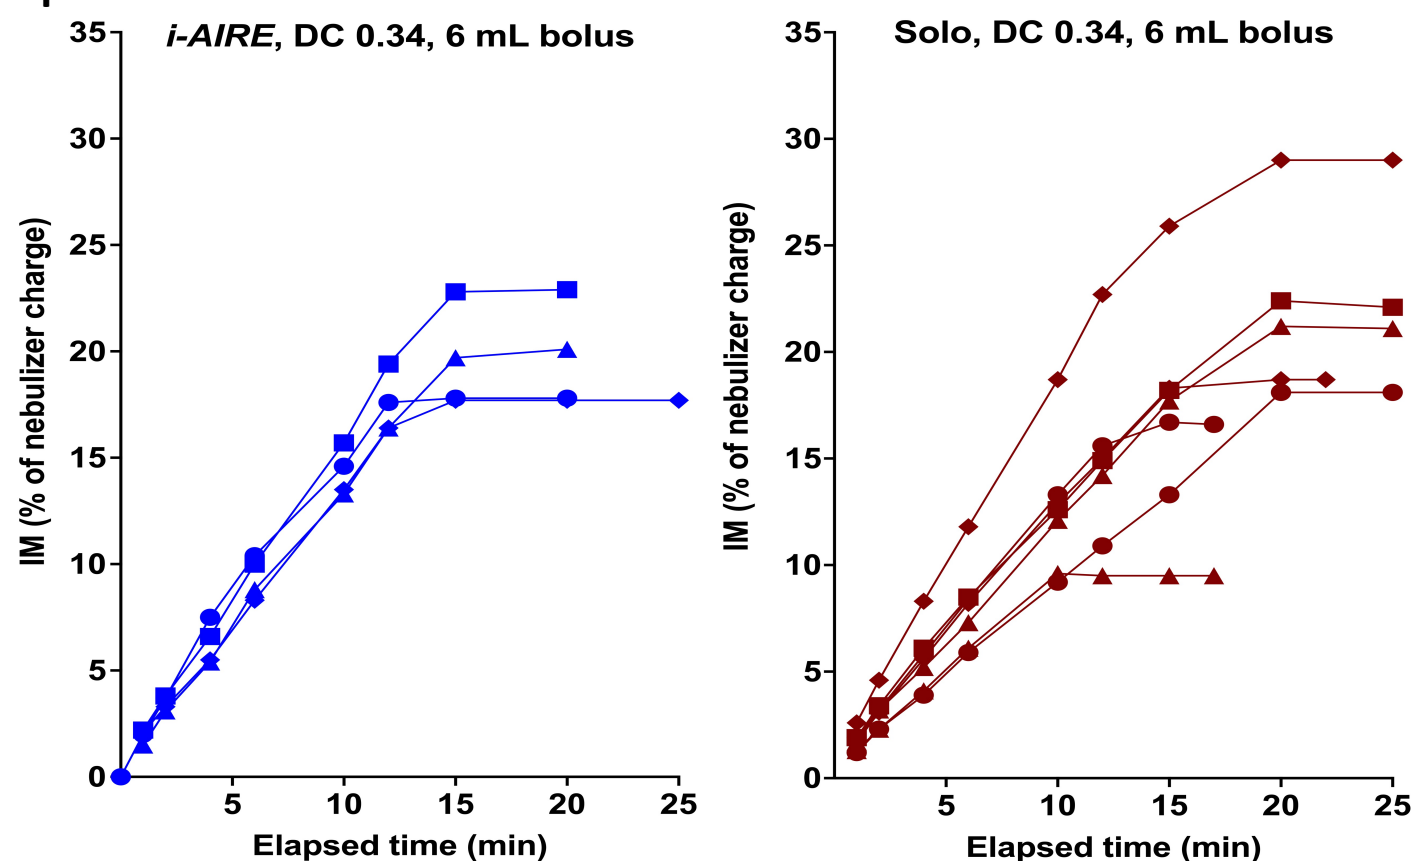

| Inhaled Mass (%) During Bolus Treatment |            |                   |                                   |
|-----------------------------------------|------------|-------------------|-----------------------------------|
| Neb                                     | Duty Cycle | Bolus Volume (mL) | Mean ±SD IM (% of syringe charge) |
| <i>i-AIRE</i>                           | 0.34       | 6                 | 19.9 ± 4.5                        |
|                                         |            | 3                 | 14.5 ± 1.7                        |
|                                         | 0.13       | 6                 | 15.5 ± 4.0                        |
|                                         |            | 3                 | 13.7 ± 2.5                        |
| Solo                                    | 0.34       | 6                 | 19.3 ± 5.9                        |
|                                         |            | 3                 | 25.5 ± 5.7                        |
|                                         | 0.13       | 6                 | 13.4 ± 3.4                        |
|                                         |            | 3                 | 13.6 ± 2.0                        |

## REGRESSION ANALYSIS

- IM during bolus treatment is affected by duty cycle and residual volume in the nebulizer; there was less residual in the *i-AIRE* as compared with Solo
- IM during continuous infusion is affected by duty cycle and infusion flow. IM was similar between *i-AIRE* and Solo
- During continuous infusion, adjustments made to the infusion flow, but not duty cycle, affected IM

Uninterrupted continuous infusion test runs; *i-AIRE* (blue), Solo (red):

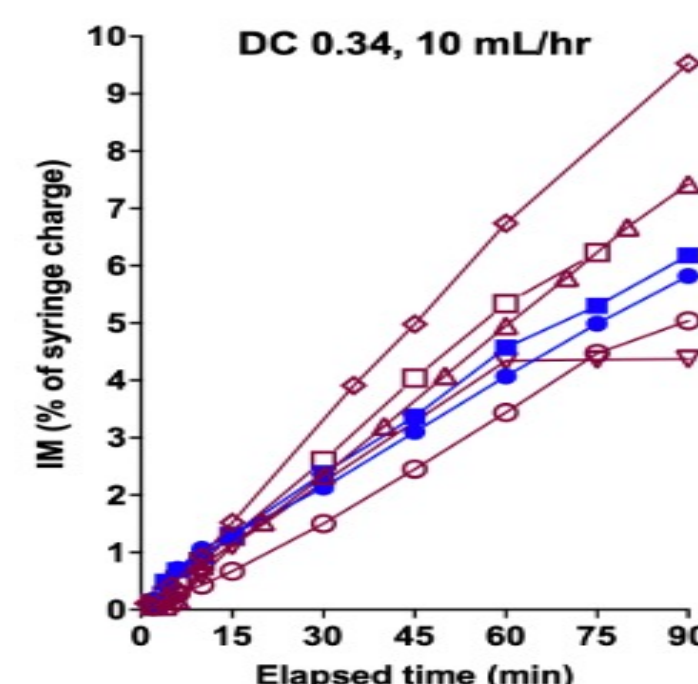

Example of continuous infusion with changes in duty cycle and infusion flow (Set 3 in Table):

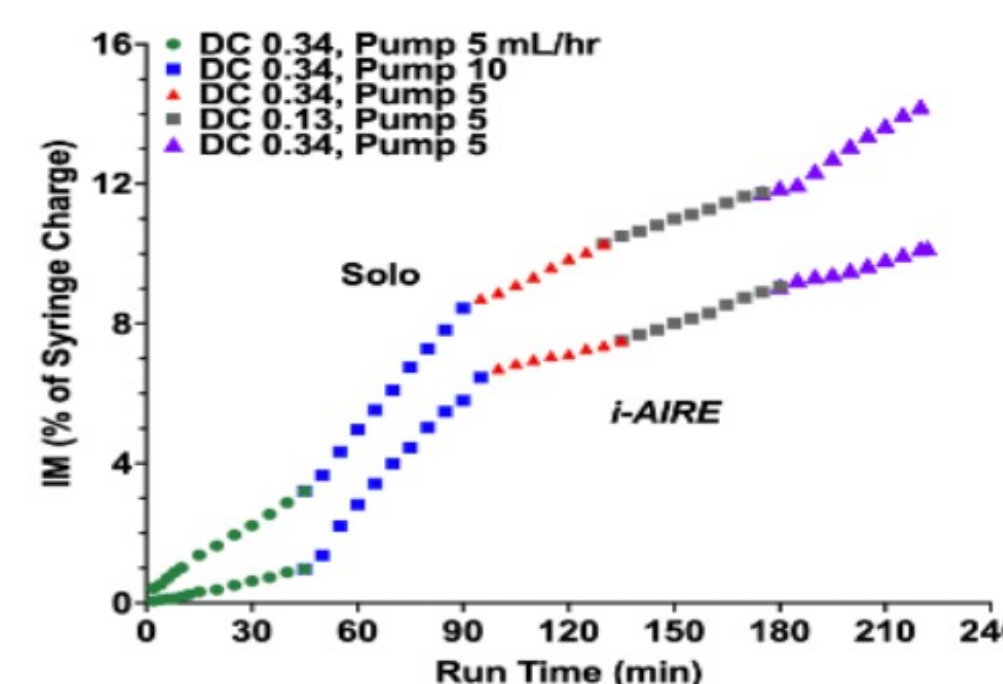

## Effect on Continuous Infusion Aerosol Delivery of Changes in Duty Cycle and/or Infusion Pump Flow

| Conditions | Duty Cycle | Infusion Pump Flow (mL/hr) | Rate of Aerosol Delivery (% of syringe charge/min) |       |       |
|------------|------------|----------------------------|----------------------------------------------------|-------|-------|
|            |            |                            | <i>i-AIRE</i>                                      | Solo  |       |
| Set 1      | Step 1     | 0.34                       | 10                                                 | 0.091 | 0.088 |
|            | Step 2     | 0.13                       | 10                                                 | 0.068 | 0.050 |
|            | Step 3     | 0.34                       | 10                                                 | 0.090 | 0.078 |
|            | Step 4     | 0.34                       | 5                                                  | 0.020 | 0.040 |
|            | Step 5     | 0.34                       | 10                                                 | 0.127 | 0.080 |
| Set 2      | Step 1     | 0.13                       | 10                                                 | 0.043 | 0.091 |
|            | Step 2     | 0.13                       | 5                                                  | 0.017 | 0.036 |
|            | Step 3     | 0.13                       | 10                                                 | 0.058 | 0.067 |
|            | Step 4     | 0.34                       | 10                                                 | 0.062 | 0.098 |
|            | Step 5     | 0.13                       | 10                                                 | 0.064 | 0.064 |
| Set 3      | Step 1     | 0.34                       | 5                                                  | 0.022 | 0.063 |
|            | Step 2     | 0.34                       | 10                                                 | 0.110 | 0.118 |
|            | Step 3     | 0.34                       | 5                                                  | 0.024 | 0.046 |
|            | Step 4     | 0.13                       | 5                                                  | 0.035 | 0.032 |
|            | Step 5     | 0.34                       | 5                                                  | 0.026 | 0.059 |
| Set 4      | Step 1     | 0.13                       | 5                                                  | 0.018 | 0.038 |
|            | Step 2     | 0.34                       | 5                                                  | 0.016 | 0.055 |
|            | Step 3     | 0.13                       | 5                                                  | 0.028 | 0.038 |
|            | Step 4     | 0.13                       | 10                                                 | 0.103 | 0.073 |
|            | Step 5     | 0.13                       | 5                                                  | 0.023 | 0.037 |

## CONCLUSIONS

- Aerosol delivery with nebulizer positioning on the dry side of the heated humidifier is similar for both nebulizer technologies
- BEJN is more predictable during bolus treatment
- When continuous infusion steady state is achieved, vent settings can be adjusted as usual with no significant impact on drug delivery; delivery can be predicted based on pump flow
